# Supplementary material
Source: PubMed Central journal article supplement (PMC4033301)

**Cutting Edge: Innate memory CD8<sup>+</sup> T cells are distinct from  
homeostatic expanded CD8<sup>+</sup> T cells and rapidly respond to primary  
antigenic stimuli**

Weishan Huang<sup>1,2</sup>, Jianfang Hu<sup>2,3</sup>, and Avery August<sup>1,2,4</sup>

<sup>1</sup>Department of Microbiology & Immunology, Cornell University, Ithaca, NY 14853,

<sup>2</sup>Department of Veterinary & Biomedical Science, Center for Molecular Immunology & Infectious Disease, The Pennsylvania State University, University Park, PA 16802

<sup>3</sup>Present Address: La Jolla Institute for Allergy and Immunology, 9420 Athena Circle, La Jolla, CA 92037

**Supplemental Data**

**Supplemental FIGURE 1. Changes in specific genes between HP and IMP CD8<sup>+</sup> T cells.** (A) Relative *Tnfrsf1a*, *Nfkb2*, *Eomes* and *Bcl2l11* expressional level in HP and *Itk*<sup>-/-</sup> CD8<sup>+</sup> T cells compared to WM IMP CD8<sup>+</sup> T cells as determined by microarray analysis. Quantile normalized gene expressional values were normalized to mean values of WM IMP CD8<sup>+</sup> T cells. n = 3 in each group. (B) Relative mRNA expression for *Tnfrsf1a*, *Nfkb2*, *Eomes* and *Bcl2l11* expressional level in HP and *Itk*<sup>-/-</sup> CD8<sup>+</sup> T cells compared to WM IMP CD8<sup>+</sup> T cells, determined by qRT-PCR. Gene expressional level was first normalized to GAPDH value of each sample, than normalized to the average value of WM IMP CD8<sup>+</sup> T cells. n = 3 in each group. \**p* < 0.05, “ns” = no significance by Student’s *t* test.

A)

| Name            | HP   | <i>Itk</i> <sup>-/-</sup> |
|-----------------|------|---------------------------|
| <i>Tnfrsf1a</i> | 5.89 | 0.97                      |
| <i>Nfkb2</i>    | 3.91 | 1.16                      |
| <i>Eomes</i>    | 0.32 | 1.68                      |
| <i>Bcl2l11</i>  | 0.12 | 1.36                      |

WM values were set as 1.

B)

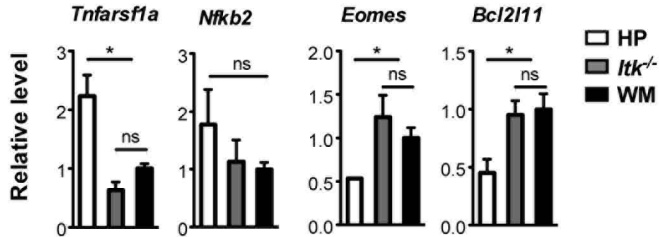

Supplement: NIHMS437358-supplement-1.pdf [file NIHMS437358-supplement-1.pdf]
